# Supplementary material for: The Role of ST2 Receptor in the Regulation of Brucella abortus Oral Infection
Source: MDPI journal article supplement (doi:10.3390/pathogens9050328), 2020-04-28
Supplement: s1 [file s1]

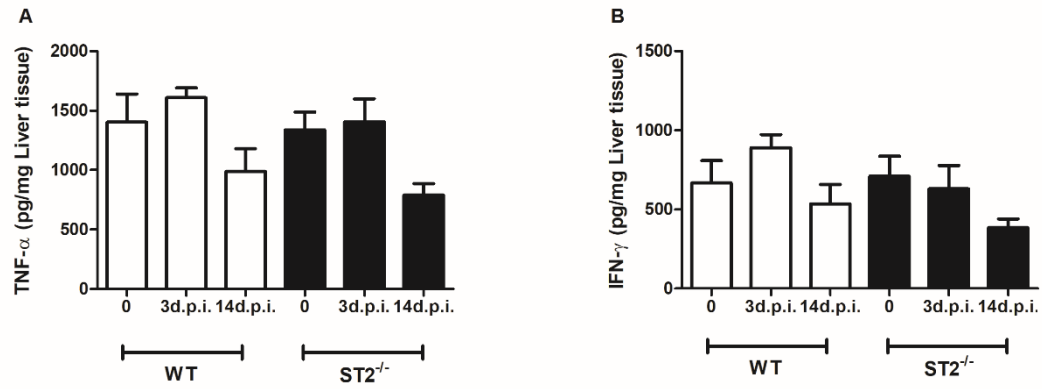

**Supplementary Figure 1.** ST2 receptor deficiency does not influence the production of IFN- $\gamma$  and TNF- $\alpha$  in liver after *Brucella abortus* infection. WT and ST2<sup>-/-</sup> mice were infected orally with  $1 \times 10^9$  CFU of *B. abortus* and after 3 or 14 days of infection liver samples were assessed for cytokine production, such as TNF- $\alpha$  (A), IFN- $\gamma$  (B) by ELISA. Results expressed as mean  $\pm$  standard deviation (n = 5).
